# Supplementary material for: Bayesian-based noninvasive prenatal diagnosis of single-gene disorders
Source: PubMed Central journal article supplement (PMC6396420; doi:10.1101/gr.235796.118), 2019-03
Supplement: supp_gr.235796.118_Supplemental_Fig_S1.pdf [file supp_gr.235796.118_Supplemental_Fig_S1.pdf]

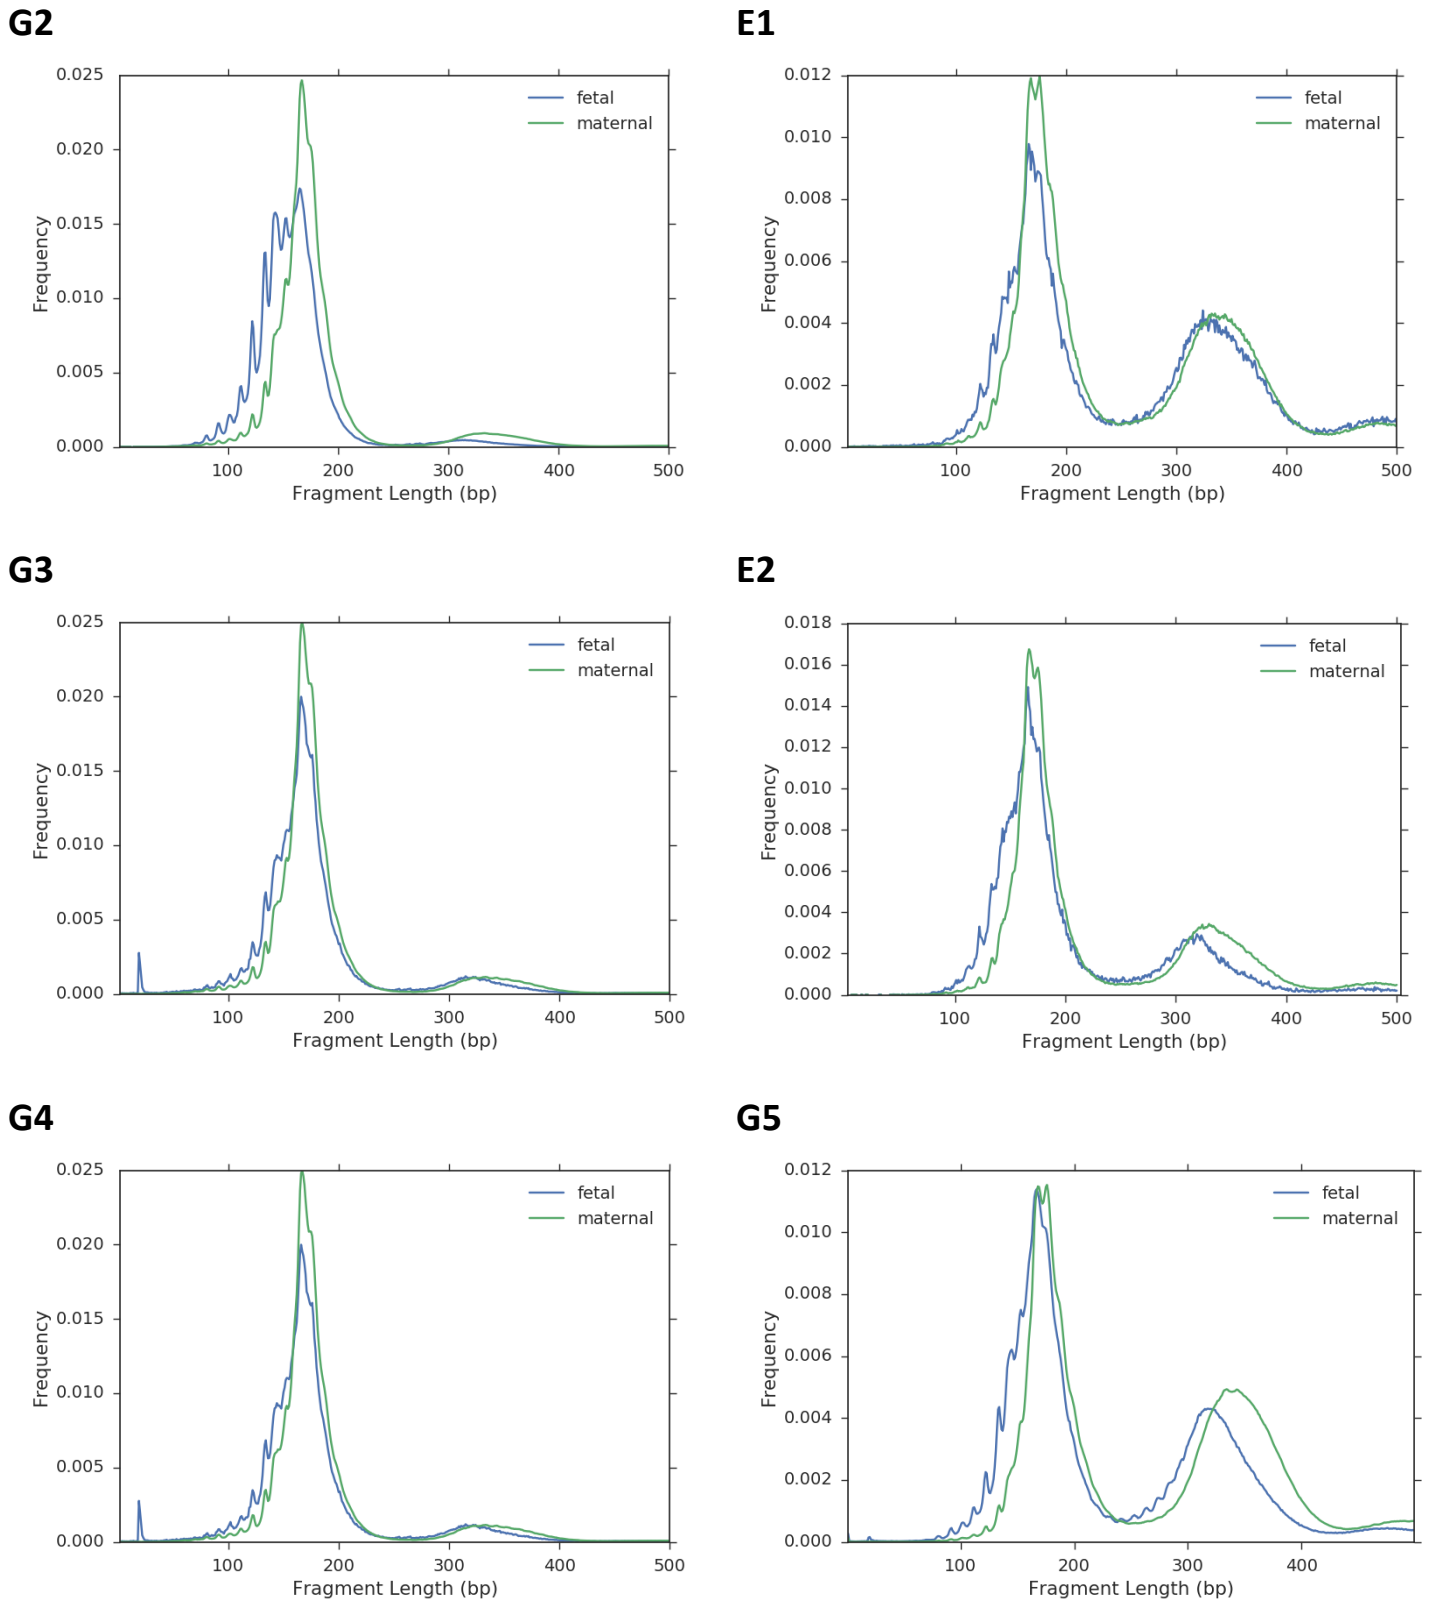

**Supplemental Figure S1.** Cell-free DNA fragment length distributions.

Presented are fetal and maternal fragment length distributions for families included in this study (family G1's distribution is shown in Figure 2 of the manuscript).
