# Supplementary material for: Bayesian-based noninvasive prenatal diagnosis of single-gene disorders
Source: PubMed Central journal article supplement (PMC6396420; doi:10.1101/gr.235796.118), 2019-03
Supplement: supp_gr.235796.118_Supplemental_Fig_S4.pdf [file supp_gr.235796.118_Supplemental_Fig_S4.pdf]

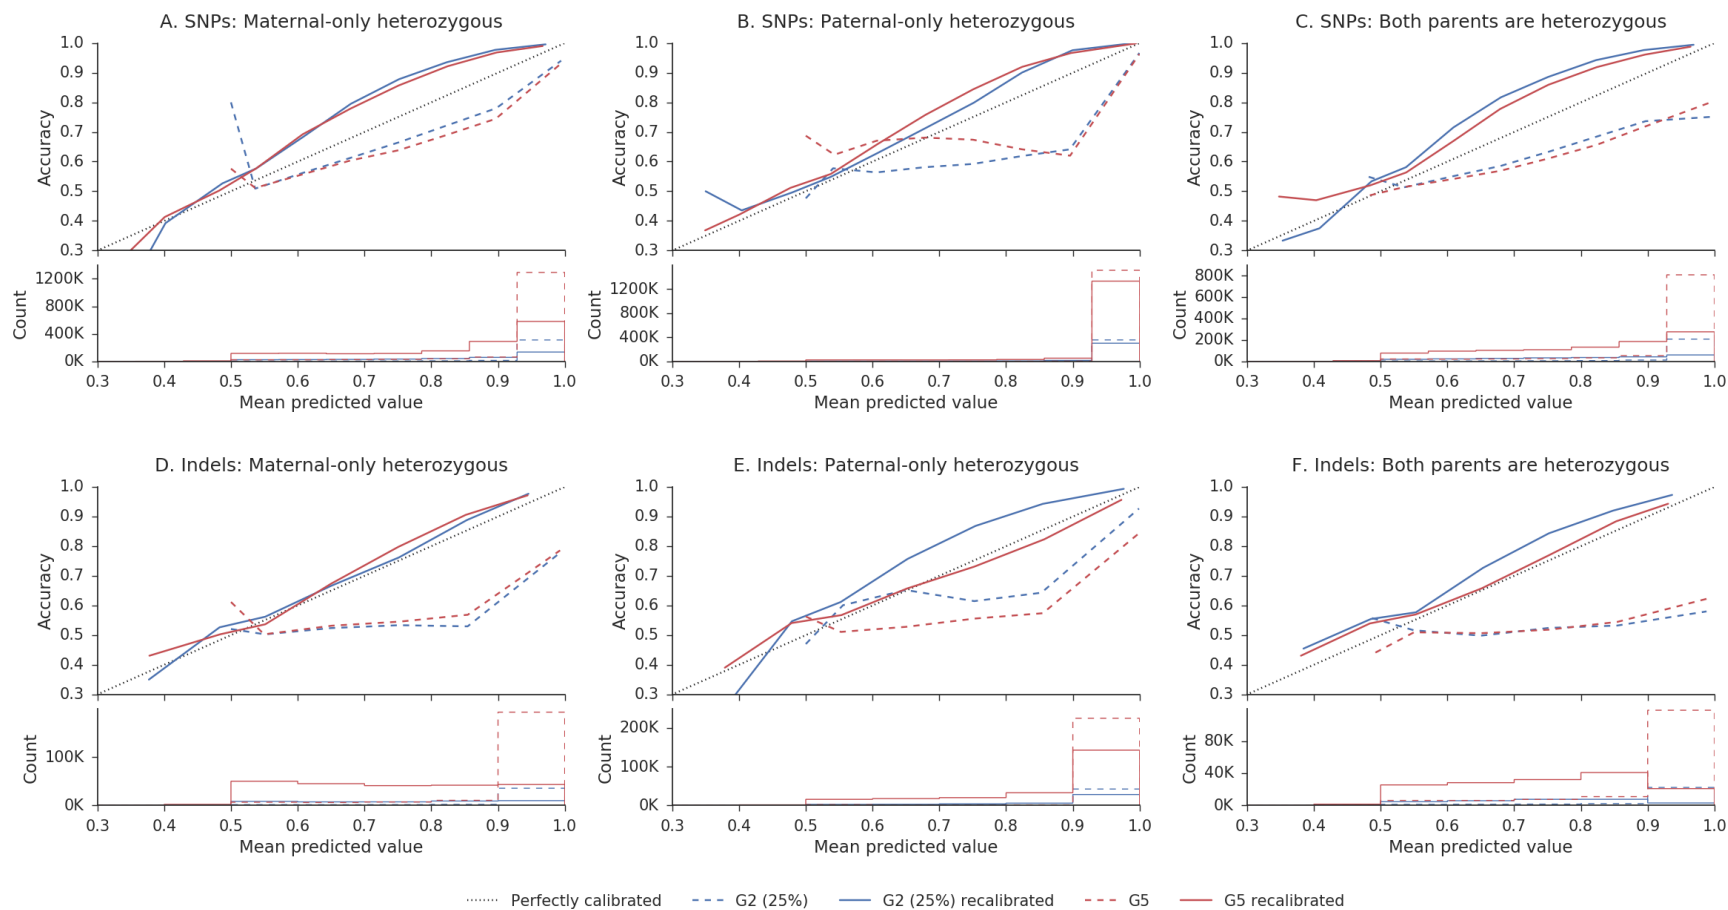

**Supplemental Figure S4.** Calibration of the model's accuracy.

Shown here is the accuracy as a function of the prediction probability, before and after variant recalibration. The “perfectly calibrated” line represents a situation in which the probability assigned to a prediction perfectly describes the probability of being correct (in terms of accuracy). Presented in the lower pane of each figure is the marginal distribution of loci in each bin.
