# Supplementary material for: Bayesian-based noninvasive prenatal diagnosis of single-gene disorders
Source: Genome Res. 2019 Mar;29(3):428–38. doi: 10.1101/gr.235796.118 (PMC6396420; doi:10.1101/gr.235796.118)
Supplement: Supplemental Material [file supp_gr.235796.118_Supplemental_Table_S1.xlsx]

## Sheet: Sheet1
Supplemental Table S1. Features used in the machine learning models.
Name	Source	Description
CHROM	cfDNA preprocessing (Freebayes)	Chromose
POS	cfDNA preprocessing (Freebayes)	Start position
REF	cfDNA preprocessing (Freebayes)	Reference allele
ALT	cfDNA preprocessing (Freebayes)	Alternate allele
GT	Hoobari	Genotype
DP	cfDNA preprocessing (Freebayes)	Read Depth
AD	cfDNA preprocessing (Freebayes)	Number of observation for each allele
RO	cfDNA preprocessing (Freebayes)	Reference allele observation count
QR	cfDNA preprocessing (Freebayes)	Sum of quality of the reference observations
AO	cfDNA preprocessing (Freebayes)	Alternate allele observation count
QA	cfDNA preprocessing (Freebayes)	Sum of quality of the alternate observations
QUAL	Hoobari	Fetal prediction QUAL score
GL	Hoobari	Genotype Likelihood, log10-scaled likelihoods of the data given the called genotype for each possible genotype generated from the reference and alternate alleles given the sample ploidy
PG	Hoobari	P(Genotype), Per-site genotype prior probabilities
PP	Hoobari	P(Posterior), Per-site genotype posterior probabilities
MGT	Parental variant calling (Freebayes)	Mother's Genotype
MGQ	Parental variant calling (Freebayes)	Mother's Genotype Quality, the Phred-scaled marginal (or unconditional) probability of the called genotype
MGL	Parental variant calling (Freebayes)	Mother's Genotype Likelihood, log10-scaled likelihoods of the data given the called genotype for each possible genotype generated from the reference and alternate alleles given the sample ploidy
MAD	Parental variant calling (Freebayes)	Mother's Number of observation for each allele
MDP	Parental variant calling (Freebayes)	Mother's Read Depth
MRO	Parental variant calling (Freebayes)	Mother's Reference allele observation count
MQR	Parental variant calling (Freebayes)	Mother's Sum of quality of the reference observations
MAO	Parental variant calling (Freebayes)	Mother's Alternate allele observation count
MQA	Parental variant calling (Freebayes)	Mother's Sum of quality of the alternate observations
FGT	Parental variant calling (Freebayes)	Father's Genotype
FGQ	Parental variant calling (Freebayes)	Father's Genotype Quality, the Phred-scaled marginal (or unconditional) probability of the called genotype
FGL	Parental variant calling (Freebayes)	Father's Genotype Likelihood, log10-scaled likelihoods of the data given the called genotype for each possible genotype generated from the reference and alternate alleles given the sample ploidy
FAD	Parental variant calling (Freebayes)	Father's Number of observation for each allele
FDP	Parental variant calling (Freebayes)	Father's Read Depth
FRO	Parental variant calling (Freebayes)	Father's Reference allele observation count
FQR	Parental variant calling (Freebayes)	Father's Sum of quality of the reference observations
FAO	Parental variant calling (Freebayes)	Father's Alternate allele observation count
FQA	Parental variant calling (Freebayes)	Father's Sum of quality of the alternate observations
MFQ	Parental variant calling (Freebayes)	Mother's and Father's QUAL score from the parental vcf
NS	cfDNA preprocessing (Freebayes)	Number of samples with data
DP	cfDNA preprocessing (Freebayes)	Total read depth at the locus
DPB	cfDNA preprocessing (Freebayes)	Total read depth per bp at the locus; bases in reads overlapping / bases in haplotype
AC	cfDNA preprocessing (Freebayes)	Total number of alternate alleles in called genotypes
AN	cfDNA preprocessing (Freebayes)	Total number of alleles in called genotypes
AF	cfDNA preprocessing (Freebayes)	Estimated allele frequency in the range (0,1]
RO	cfDNA preprocessing (Freebayes)	Count of full observations of the reference haplotype.
AO	cfDNA preprocessing (Freebayes)	Count of full observations of this alternate haplotype.
PRO	cfDNA preprocessing (Freebayes)	Reference allele observation count, with partial observations recorded fractionally
PAO	cfDNA preprocessing (Freebayes)	Alternate allele observations, with partial observations recorded fractionally
QR	cfDNA preprocessing (Freebayes)	Reference allele quality sum in phred
QA	cfDNA preprocessing (Freebayes)	Alternate allele quality sum in phred
PQR	cfDNA preprocessing (Freebayes)	Reference allele quality sum in phred for partial observations
PQA	cfDNA preprocessing (Freebayes)	Alternate allele quality sum in phred for partial observations
SRF	cfDNA preprocessing (Freebayes)	Number of reference observations on the forward strand
SRR	cfDNA preprocessing (Freebayes)	Number of reference observations on the reverse strand
SAF	cfDNA preprocessing (Freebayes)	Number of alternate observations on the forward strand
SAR	cfDNA preprocessing (Freebayes)	Number of alternate observations on the reverse strand
SRP	cfDNA preprocessing (Freebayes)	Strand balance probability for the reference allele: Phred-scaled upper-bounds estimate of the probability of observing the deviation between SRF and SRR given E(SRF/SRR) ~ 0.5, derived using Hoeffding's inequality
SAP	cfDNA preprocessing (Freebayes)	Strand balance probability for the alternate allele: Phred-scaled upper-bounds estimate of the probability of observing the deviation between SAF and SAR given E(SAF/SAR) ~ 0.5, derived using Hoeffding's inequality
AB	cfDNA preprocessing (Freebayes)	Allele balance at heterozygous sites: a number between 0 and 1 representing the ratio of reads showing the reference allele to all reads, considering only reads from individuals called as heterozygous
ABP	cfDNA preprocessing (Freebayes)	Allele balance probability at heterozygous sites: Phred-scaled upper-bounds estimate of the probability of observing the deviation between ABR and ABA given E(ABR/ABA) ~ 0.5, derived using Hoeffding's inequality
RUN	cfDNA preprocessing (Freebayes)	Run length: the number of consecutive repeats of the alternate allele in the reference genome
RPP	cfDNA preprocessing (Freebayes)	Read Placement Probability: Phred-scaled upper-bounds estimate of the probability of observing the deviation between RPL and RPR given E(RPL/RPR) ~ 0.5, derived using Hoeffding's inequality
RPPR	cfDNA preprocessing (Freebayes)	Read Placement Probability for reference observations: Phred-scaled upper-bounds estimate of the probability of observing the deviation between RPL and RPR given E(RPL/RPR) ~ 0.5, derived using Hoeffding's inequality
RPL	cfDNA preprocessing (Freebayes)	Reads Placed Left: number of reads supporting the alternate balanced to the left (5') of the alternate allele
RPR	cfDNA preprocessing (Freebayes)	Reads Placed Right: number of reads supporting the alternate balanced to the right (3') of the alternate allele
EPP	cfDNA preprocessing (Freebayes)	End Placement Probability: Phred-scaled upper-bounds estimate of the probability of observing the deviation between EL and ER given E(EL/ER) ~ 0.5, derived using Hoeffding's inequality
EPPR	cfDNA preprocessing (Freebayes)	End Placement Probability for reference observations: Phred-scaled upper-bounds estimate of the probability of observing the deviation between EL and ER given E(EL/ER) ~ 0.5, derived using Hoeffding's inequality
DPRA	cfDNA preprocessing (Freebayes)	Alternate allele depth ratio. Ratio between depth in samples with each called alternate allele and those without.
ODDS	cfDNA preprocessing (Freebayes)	The log odds ratio of the best genotype combination to the second-best.
GTI	cfDNA preprocessing (Freebayes)	Number of genotyping iterations required to reach convergence or bailout.
TYPE	cfDNA preprocessing (Freebayes)	The type of allele, either snp, mnp, ins, del, or complex.
CIGAR	cfDNA preprocessing (Freebayes)	The extended CIGAR representation of each alternate allele, with the exception that '=' is replaced by 'M' to ease VCF parsing. Note that INDEL alleles do not have the first matched base (which is provided by default, per the spec) referred to by the CIGAR.
NUMALT	cfDNA preprocessing (Freebayes)	Number of unique non-reference alleles in called genotypes at this position.
MEANALT	cfDNA preprocessing (Freebayes)	Mean number of unique non-reference allele observations per sample with the corresponding alternate alleles.
LEN	cfDNA preprocessing (Freebayes)	allele length
MQM	cfDNA preprocessing (Freebayes)	Mean mapping quality of observed alternate alleles
MQMR	cfDNA preprocessing (Freebayes)	Mean mapping quality of observed reference alleles
PAIRED	cfDNA preprocessing (Freebayes)	Proportion of observed alternate alleles which are supported by properly paired read fragments
PAIREDR	cfDNA preprocessing (Freebayes)	Proportion of observed reference alleles which are supported by properly paired read fragments
MIN_DP	cfDNA preprocessing (Freebayes)	Minimum depth in gVCF output block.
END	cfDNA preprocessing (Freebayes)	Last position (inclusive) in gVCF output record.
technology.ILLUMINA	cfDNA preprocessing (Freebayes)	Fraction of observations supporting the alternate observed in reads from ILLUMINA
PNS	Parental variant calling (Freebayes)	Parents Number of samples with data
PDP	Parental variant calling (Freebayes)	Parents Total read depth at the locus
PDPB	Parental variant calling (Freebayes)	Parents Total read depth per bp at the locus; bases in reads overlapping / bases in haplotype
PAC	Parental variant calling (Freebayes)	Parents Total number of alternate alleles in called genotypes
PAN	Parental variant calling (Freebayes)	Parents Total number of alleles in called genotypes
PAF	Parental variant calling (Freebayes)	Parents Estimated allele frequency in the range (0,1]
PRO	Parental variant calling (Freebayes)	Parents Reference allele observation count, with partial observations recorded fractionally
PAO	Parental variant calling (Freebayes)	Parents Alternate allele observations, with partial observations recorded fractionally
PPRO	Parental variant calling (Freebayes)	Parents Reference allele observation count, with partial observations recorded fractionally
PPAO	Parental variant calling (Freebayes)	Parents Alternate allele observations, with partial observations recorded fractionally
PQR	Parental variant calling (Freebayes)	Parents Reference allele quality sum in phred
PQA	Parental variant calling (Freebayes)	Parents Alternate allele quality sum in phred
PPQR	Parental variant calling (Freebayes)	Parents Reference allele quality sum in phred for partial observations
PPQA	Parental variant calling (Freebayes)	Parents Alternate allele quality sum in phred for partial observations
PSRF	Parental variant calling (Freebayes)	Parents Number of reference observations on the forward strand
PSRR	Parental variant calling (Freebayes)	Parents Number of reference observations on the reverse strand
PSAF	Parental variant calling (Freebayes)	Parents Number of alternate observations on the forward strand
PSAR	Parental variant calling (Freebayes)	Parents Number of alternate observations on the reverse strand
PSRP	Parental variant calling (Freebayes)	Parents Strand balance probability for the reference allele: Phred-scaled upper-bounds estimate of the probability of observing the deviation between SRF and SRR given E(SRF/SRR) ~ 0.5, derived using Hoeffding's inequality
PSAP	Parental variant calling (Freebayes)	Parents Strand balance probability for the alternate allele: Phred-scaled upper-bounds estimate of the probability of observing the deviation between SAF and SAR given E(SAF/SAR) ~ 0.5, derived using Hoeffding's inequality
PAB	Parental variant calling (Freebayes)	Parents Allele balance at heterozygous sites: a number between 0 and 1 representing the ratio of reads showing the reference allele to all reads, considering only reads from individuals called as heterozygous
PABP	Parental variant calling (Freebayes)	Parents Allele balance probability at heterozygous sites: Phred-scaled upper-bounds estimate of the probability of observing the deviation between ABR and ABA given E(ABR/ABA) ~ 0.5, derived using Hoeffding's inequality
PRUN	Parental variant calling (Freebayes)	Parents Run length: the number of consecutive repeats of the alternate allele in the reference genome
PRPP	Parental variant calling (Freebayes)	Parents Read Placement Probability: Phred-scaled upper-bounds estimate of the probability of observing the deviation between RPL and RPR given E(RPL/RPR) ~ 0.5, derived using Hoeffding's inequality
PRPPR	Parental variant calling (Freebayes)	Parents Read Placement Probability for reference observations: Phred-scaled upper-bounds estimate of the probability of observing the deviation between RPL and RPR given E(RPL/RPR) ~ 0.5, derived using Hoeffding's inequality
PRPL	Parental variant calling (Freebayes)	Parents Reads Placed Left: number of reads supporting the alternate balanced to the left (5') of the alternate allele
PRPR	Parental variant calling (Freebayes)	Parents Reads Placed Right: number of reads supporting the alternate balanced to the right (3') of the alternate allele
PEPP	Parental variant calling (Freebayes)	Parents End Placement Probability: Phred-scaled upper-bounds estimate of the probability of observing the deviation between EL and ER given E(EL/ER) ~ 0.5, derived using Hoeffding's inequality
PRPPR	Parental variant calling (Freebayes)	Parents Read Placement Probability for reference observations: Phred-scaled upper-bounds estimate of the probability of observing the deviation between RPL and RPR given E(RPL/RPR) ~ 0.5, derived using Hoeffding's inequality
PRPL	Parental variant calling (Freebayes)	Parents Reads Placed Left: number of reads supporting the alternate balanced to the left (5') of the alternate allele
PRPR	Parental variant calling (Freebayes)	Parents Reads Placed Right: number of reads supporting the alternate balanced to the right (3') of the alternate allele
PEPP	Parental variant calling (Freebayes)	Parents End Placement Probability: Phred-scaled upper-bounds estimate of the probability of observing the deviation between EL and ER given E(EL/ER) ~ 0.5, derived using Hoeffding's inequality
PEPPR	Parental variant calling (Freebayes)	Parents End Placement Probability for reference observations: Phred-scaled upper-bounds estimate of the probability of observing the deviation between EL and ER given E(EL/ER) ~ 0.5, derived using Hoeffding's inequality
PDPRA	Parental variant calling (Freebayes)	Parents Alternate allele depth ratio. Ratio between depth in samples with each called alternate allele and those without.
PODDS	Parental variant calling (Freebayes)	Parents The log odds ratio of the best genotype combination to the second-best.
PGTI	Parental variant calling (Freebayes)	Parents Number of genotyping iterations required to reach convergence or bailout.
PTYPE	Parental variant calling (Freebayes)	Parents The type of allele, either snp, mnp, ins, del, or complex.
PCIGAR	Parental variant calling (Freebayes)	Parents The extended CIGAR representation of each alternate allele, with the exception that '=' is replaced by 'M' to ease VCF parsing. Note that INDEL alleles do not have the first matched base (which is provided by default, per the spec) referred to by the CIGAR.
PNUMALT	Parental variant calling (Freebayes)	Parents Number of unique non-reference alleles in called genotypes at this position.
PMEANALT	Parental variant calling (Freebayes)	Parents Mean number of unique non-reference allele observations per sample with the corresponding alternate alleles.
PLEN	Parental variant calling (Freebayes)	Parents allele length
PMQM	Parental variant calling (Freebayes)	Parents Mean mapping quality of observed alternate alleles
PMQMR	Parental variant calling (Freebayes)	Parents Mean mapping quality of observed reference alleles
PPAIRED	Parental variant calling (Freebayes)	Parents Proportion of observed alternate alleles which are supported by properly paired read fragments
PPAIREDR	Parental variant calling (Freebayes)	Parents Proportion of observed reference alleles which are supported by properly paired read fragments
PMIN	Parental variant calling (Freebayes)	Parents Minimum depth in gVCF output block.
PEND	Parental variant calling (Freebayes)	Parents Last position (inclusive) in gVCF output record.
Ptechnology.ILLUMINA	Parental variant calling (Freebayes)	Parents Fraction of observations supporting the alternate observed in reads from ILLUMINA
