# Supplementary material for: Bayesian-based noninvasive prenatal diagnosis of single-gene disorders
Source: Genome Res. 2019 Mar;29(3):428–38. doi: 10.1101/gr.235796.118 (PMC6396420; doi:10.1101/gr.235796.118)
Supplement: Supplemental Material [file supp_gr.235796.118_Supplemental_Table_S2.xlsx]

## Sheet: Sheet1
Supplemental Table S2. Comparison of machine learning models.
test_family	var_type	clf_name	parents_test_settings	hoob_acc	hoob_micro_auc	model_acc	model_micro_auc	trained_on
G2	indel	RandomForestClassifier	MhetFhom positions	0.721672	0.889659	0.790607	0.94188	INDELs+SNPs G1 MGT="0/1" and FGT in ("0/0","1/1")
G2	indel	VotingClassifier RF, XGB, ADA	MhetFhom positions	0.721672	0.889659	0.787161	0.942245	INDELs+SNPs G1 MGT="0/1" and FGT in ("0/0","1/1")
G2	indel	XGBClassifier	MhetFhom positions	0.721672	0.889659	0.779405	0.937891	INDELs+SNPs G1 MGT="0/1" and FGT in ("0/0","1/1")
G2	indel	RandomForestClassifier	MhetFhom positions	0.721672	0.889659	0.744938	0.917566	INDELs G1 MGT="0/1" and FGT in ("0/0","1/1")
G2	indel	VotingClassifier RF, XGB, ADA	MhetFhom positions	0.721672	0.889659	0.743214	0.920231	INDELs G1 MGT="0/1" and FGT in ("0/0","1/1")
G2	indel	VotingClassifier RF, XGB, ADA	MhetFhom positions	0.721672	0.889659	0.739336	0.915731	INDELs G1 (MGT="0/1" or FGT="0/1")
G2	indel	XGBClassifier	MhetFhom positions	0.721672	0.889659	0.738475	0.918753	INDELs G1 MGT="0/1" and FGT in ("0/0","1/1")
G2	indel	XGBClassifier	MhetFhom positions	0.721672	0.889659	0.738044	0.915618	INDELs G1 (MGT="0/1" or FGT="0/1")
G2	indel	RandomForestClassifier	MhetFhom positions	0.721672	0.889659	0.734597	0.912188	INDELs G1 (MGT="0/1" or FGT="0/1")
G2	indel	AdaBoostClassifier	MhetFhom positions	0.721672	0.889659	0.723826	0.876475	INDELs+SNPs G1 MGT="0/1" and FGT in ("0/0","1/1")
G2	indel	LogisticRegression	MhetFhom positions	0.721672	0.889659	0.698406	0.86484	INDELs+SNPs G1 MGT="0/1" and FGT in ("0/0","1/1")
G2	indel	AdaBoostClassifier	MhetFhom positions	0.721672	0.889659	0.691081	0.888664	INDELs G1 (MGT="0/1" or FGT="0/1")
G2	indel	LogisticRegression	MhetFhom positions	0.721672	0.889659	0.688065	0.862928	INDELs G1 MGT="0/1" and FGT in ("0/0","1/1")
G2	indel	AdaBoostClassifier	MhetFhom positions	0.721672	0.889659	0.685911	0.856629	INDELs G1 MGT="0/1" and FGT in ("0/0","1/1")
G2	indel	LogisticRegression	MhetFhom positions	0.721672	0.889659	0.618268	0.859232	INDELs G1 (MGT="0/1" or FGT="0/1")
G2	indel	KNeighborsClassifier	MhetFhom positions	0.721672	0.889659	0.529944	0.752868	INDELs G1 MGT="0/1" and FGT in ("0/0","1/1")
G2	indel	KNeighborsClassifier	MhetFhom positions	0.721672	0.889659	0.528221	0.746362	INDELs G1 (MGT="0/1" or FGT="0/1")
G2	indel	KNeighborsClassifier	MhetFhom positions	0.721672	0.889659	0.503662	0.720124	INDELs+SNPs G1 MGT="0/1" and FGT in ("0/0","1/1")
G2	indel	VotingClassifier RF, XGB, ADA	MhetFhet positions	0.556522	0.743325	0.811371	0.935551	INDELs+SNPs G1 MGT="0/1" and FGT="0/1"
G2	indel	RandomForestClassifier	MhetFhet positions	0.556522	0.743325	0.807358	0.935632	INDELs+SNPs G1 MGT="0/1" and FGT="0/1"
G2	indel	XGBClassifier	MhetFhet positions	0.556522	0.743325	0.804013	0.929416	INDELs+SNPs G1 MGT="0/1" and FGT="0/1"
G2	indel	RandomForestClassifier	MhetFhet positions	0.556522	0.743325	0.762542	0.901281	INDELs G1 MGT="0/1" and FGT="0/1"
G2	indel	VotingClassifier RF, XGB, ADA	MhetFhet positions	0.556522	0.743325	0.756522	0.913631	INDELs G1 (MGT="0/1" or FGT="0/1")
G2	indel	XGBClassifier	MhetFhet positions	0.556522	0.743325	0.753846	0.91432	INDELs G1 (MGT="0/1" or FGT="0/1")
G2	indel	RandomForestClassifier	MhetFhet positions	0.556522	0.743325	0.749164	0.906255	INDELs G1 (MGT="0/1" or FGT="0/1")
G2	indel	VotingClassifier RF, XGB, ADA	MhetFhet positions	0.556522	0.743325	0.743813	0.904011	INDELs G1 MGT="0/1" and FGT="0/1"
G2	indel	XGBClassifier	MhetFhet positions	0.556522	0.743325	0.725084	0.899734	INDELs G1 MGT="0/1" and FGT="0/1"
G2	indel	LogisticRegression	MhetFhet positions	0.556522	0.743325	0.693645	0.862811	INDELs G1 (MGT="0/1" or FGT="0/1")
G2	indel	AdaBoostClassifier	MhetFhet positions	0.556522	0.743325	0.687625	0.881792	INDELs+SNPs G1 MGT="0/1" and FGT="0/1"
G2	indel	LogisticRegression	MhetFhet positions	0.556522	0.743325	0.67893	0.828105	INDELs G1 MGT="0/1" and FGT="0/1"
G2	indel	LogisticRegression	MhetFhet positions	0.556522	0.743325	0.66087	0.839219	INDELs+SNPs G1 MGT="0/1" and FGT="0/1"
G2	indel	AdaBoostClassifier	MhetFhet positions	0.556522	0.743325	0.644816	0.833767	INDELs G1 MGT="0/1" and FGT="0/1"
G2	indel	AdaBoostClassifier	MhetFhet positions	0.556522	0.743325	0.619398	0.888219	INDELs G1 (MGT="0/1" or FGT="0/1")
G2	indel	KNeighborsClassifier	MhetFhet positions	0.556522	0.743325	0.603344	0.746533	INDELs G1 MGT="0/1" and FGT="0/1"
G2	indel	KNeighborsClassifier	MhetFhet positions	0.556522	0.743325	0.527759	0.713558	INDELs G1 (MGT="0/1" or FGT="0/1")
G2	indel	KNeighborsClassifier	MhetFhet positions	0.556522	0.743325	0.514381	0.671146	INDELs+SNPs G1 MGT="0/1" and FGT="0/1"
G2	indel	VotingClassifier RF, XGB, ADA	FhetMhom positions	0.920346	0.956751	0.938528	0.992053	INDELs G1 FGT="0/1" and MGT in ("0/0","1/1")
G2	indel	RandomForestClassifier	FhetMhom positions	0.920346	0.956751	0.937662	0.991317	INDELs G1 (MGT="0/1" or FGT="0/1")
G2	indel	XGBClassifier	FhetMhom positions	0.920346	0.956751	0.936797	0.991698	INDELs+SNPs G1 FGT="0/1" and MGT in ("0/0","1/1")
G2	indel	VotingClassifier RF, XGB, ADA	FhetMhom positions	0.920346	0.956751	0.936797	0.992149	INDELs+SNPs G1 FGT="0/1" and MGT in ("0/0","1/1")
G2	indel	VotingClassifier RF, XGB, ADA	FhetMhom positions	0.920346	0.956751	0.936364	0.991627	INDELs G1 (MGT="0/1" or FGT="0/1")
G2	indel	XGBClassifier	FhetMhom positions	0.920346	0.956751	0.936364	0.991905	INDELs G1 FGT="0/1" and MGT in ("0/0","1/1")
G2	indel	RandomForestClassifier	FhetMhom positions	0.920346	0.956751	0.935931	0.991251	INDELs+SNPs G1 FGT="0/1" and MGT in ("0/0","1/1")
G2	indel	RandomForestClassifier	FhetMhom positions	0.920346	0.956751	0.934632	0.991287	INDELs G1 FGT="0/1" and MGT in ("0/0","1/1")
G2	indel	XGBClassifier	FhetMhom positions	0.920346	0.956751	0.930736	0.990245	INDELs G1 (MGT="0/1" or FGT="0/1")
G2	indel	AdaBoostClassifier	FhetMhom positions	0.920346	0.956751	0.913853	0.940802	INDELs G1 FGT="0/1" and MGT in ("0/0","1/1")
G2	indel	AdaBoostClassifier	FhetMhom positions	0.920346	0.956751	0.910823	0.946988	INDELs G1 (MGT="0/1" or FGT="0/1")
G2	indel	LogisticRegression	FhetMhom positions	0.920346	0.956751	0.866667	0.970211	INDELs+SNPs G1 FGT="0/1" and MGT in ("0/0","1/1")
G2	indel	LogisticRegression	FhetMhom positions	0.920346	0.956751	0.815584	0.931771	INDELs G1 FGT="0/1" and MGT in ("0/0","1/1")
G2	indel	LogisticRegression	FhetMhom positions	0.920346	0.956751	0.733766	0.904314	INDELs G1 (MGT="0/1" or FGT="0/1")
G2	indel	AdaBoostClassifier	FhetMhom positions	0.920346	0.956751	0.71342	0.963862	INDELs+SNPs G1 FGT="0/1" and MGT in ("0/0","1/1")
G2	indel	KNeighborsClassifier	FhetMhom positions	0.920346	0.956751	0.564935	0.764665	INDELs G1 (MGT="0/1" or FGT="0/1")
G2	indel	KNeighborsClassifier	FhetMhom positions	0.920346	0.956751	0.548052	0.756448	INDELs G1 FGT="0/1" and MGT in ("0/0","1/1")
G2	indel	KNeighborsClassifier	FhetMhom positions	0.920346	0.956751	0.494372	0.718072	INDELs+SNPs G1 FGT="0/1" and MGT in ("0/0","1/1")
G2	snp	VotingClassifier RF, XGB, ADA	MhetFhom positions	0.914163	0.968595	0.914406	0.987117	SNPs G1 MGT="0/1" and FGT in ("0/0","1/1")
G2	snp	VotingClassifier RF, XGB, ADA	MhetFhom positions	0.914163	0.968595	0.914082	0.9867	SNPs G1 (MGT="0/1" or FGT="0/1")
G2	snp	XGBClassifier	MhetFhom positions	0.914163	0.968595	0.913514	0.986588	SNPs G1 MGT="0/1" and FGT in ("0/0","1/1")
G2	snp	XGBClassifier	MhetFhom positions	0.914163	0.968595	0.913149	0.985784	SNPs G1 (MGT="0/1" or FGT="0/1")
G2	snp	RandomForestClassifier	MhetFhom positions	0.914163	0.968595	0.912622	0.986566	SNPs G1 (MGT="0/1" or FGT="0/1")
G2	snp	RandomForestClassifier	MhetFhom positions	0.914163	0.968595	0.911852	0.986658	SNPs G1 MGT="0/1" and FGT in ("0/0","1/1")
G2	snp	AdaBoostClassifier	MhetFhom positions	0.914163	0.968595	0.875279	0.913732	SNPs G1 (MGT="0/1" or FGT="0/1")
G2	snp	LogisticRegression	MhetFhom positions	0.914163	0.968595	0.802376	0.936441	SNPs G1 MGT="0/1" and FGT in ("0/0","1/1")
G2	snp	AdaBoostClassifier	MhetFhom positions	0.914163	0.968595	0.731095	0.950709	SNPs G1 MGT="0/1" and FGT in ("0/0","1/1")
G2	snp	LogisticRegression	MhetFhom positions	0.914163	0.968595	0.715039	0.913018	SNPs G1 (MGT="0/1" or FGT="0/1")
G2	snp	KNeighborsClassifier	MhetFhom positions	0.914163	0.968595	0.505291	0.718756	SNPs G1 MGT="0/1" and FGT in ("0/0","1/1")
G2	snp	KNeighborsClassifier	MhetFhom positions	0.914163	0.968595	0.498885	0.701835	SNPs G1 (MGT="0/1" or FGT="0/1")
G2	snp	VotingClassifier RF, XGB, ADA	MhetFhet positions	0.753485	0.819393	0.889159	0.97771	SNPs G1 MGT="0/1" and FGT="0/1"
G2	snp	RandomForestClassifier	MhetFhet positions	0.753485	0.819393	0.885142	0.976761	SNPs G1 MGT="0/1" and FGT="0/1"
G2	snp	VotingClassifier RF, XGB, ADA	MhetFhet positions	0.753485	0.819393	0.884899	0.976905	SNPs G1 (MGT="0/1" or FGT="0/1")
G2	snp	RandomForestClassifier	MhetFhet positions	0.753485	0.819393	0.882829	0.976642	SNPs G1 (MGT="0/1" or FGT="0/1")
G2	snp	XGBClassifier	MhetFhet positions	0.753485	0.819393	0.882342	0.976162	SNPs G1 MGT="0/1" and FGT="0/1"
G2	snp	XGBClassifier	MhetFhet positions	0.753485	0.819393	0.88222	0.975635	SNPs G1 (MGT="0/1" or FGT="0/1")
G2	snp	AdaBoostClassifier	MhetFhet positions	0.753485	0.819393	0.777588	0.917571	SNPs G1 MGT="0/1" and FGT="0/1"
G2	snp	LogisticRegression	MhetFhet positions	0.753485	0.819393	0.663339	0.829736	SNPs G1 (MGT="0/1" or FGT="0/1")
G2	snp	AdaBoostClassifier	MhetFhet positions	0.753485	0.819393	0.652931	0.87306	SNPs G1 (MGT="0/1" or FGT="0/1")
G2	snp	LogisticRegression	MhetFhet positions	0.753485	0.819393	0.610688	0.837365	SNPs G1 MGT="0/1" and FGT="0/1"
G2	snp	KNeighborsClassifier	MhetFhet positions	0.753485	0.819393	0.507639	0.681851	SNPs G1 (MGT="0/1" or FGT="0/1")
G2	snp	KNeighborsClassifier	MhetFhet positions	0.753485	0.819393	0.507213	0.668964	SNPs G1 MGT="0/1" and FGT="0/1"
G2	snp	XGBClassifier	FhetMhom positions	0.975904	0.98901	0.97888	0.999063	SNPs G1 (MGT="0/1" or FGT="0/1")
G2	snp	VotingClassifier RF, XGB, ADA	FhetMhom positions	0.975904	0.98901	0.97888	0.999052	SNPs G1 (MGT="0/1" or FGT="0/1")
G2	snp	XGBClassifier	FhetMhom positions	0.975904	0.98901	0.978715	0.999023	SNPs G1 FGT="0/1" and MGT in ("0/0","1/1")
G2	snp	VotingClassifier RF, XGB, ADA	FhetMhom positions	0.975904	0.98901	0.978673	0.998701	SNPs G1 FGT="0/1" and MGT in ("0/0","1/1")
G2	snp	RandomForestClassifier	FhetMhom positions	0.975904	0.98901	0.978219	0.998792	SNPs G1 FGT="0/1" and MGT in ("0/0","1/1")
G2	snp	RandomForestClassifier	FhetMhom positions	0.975904	0.98901	0.978012	0.999026	SNPs G1 (MGT="0/1" or FGT="0/1")
G2	snp	AdaBoostClassifier	FhetMhom positions	0.975904	0.98901	0.963546	0.993	SNPs G1 FGT="0/1" and MGT in ("0/0","1/1")
G2	snp	AdaBoostClassifier	FhetMhom positions	0.975904	0.98901	0.959124	0.97761	SNPs G1 (MGT="0/1" or FGT="0/1")
G2	snp	LogisticRegression	FhetMhom positions	0.975904	0.98901	0.945113	0.984977	SNPs G1 FGT="0/1" and MGT in ("0/0","1/1")
G2	snp	LogisticRegression	FhetMhom positions	0.975904	0.98901	0.89721	0.97025	SNPs G1 (MGT="0/1" or FGT="0/1")
G2	snp	KNeighborsClassifier	FhetMhom positions	0.975904	0.98901	0.503327	0.717775	SNPs G1 FGT="0/1" and MGT in ("0/0","1/1")
G2	snp	KNeighborsClassifier	FhetMhom positions	0.975904	0.98901	0.501137	0.710347	SNPs G1 (MGT="0/1" or FGT="0/1")
