# Supplementary material for: Bayesian-based noninvasive prenatal diagnosis of single-gene disorders
Source: Genome Res. 2019 Mar;29(3):428–38. doi: 10.1101/gr.235796.118 (PMC6396420; doi:10.1101/gr.235796.118)
Supplement: Supplemental Material [file supp_gr.235796.118_Supplemental_Table_S3.xlsx]

## Sheet: Supplementary Table S3
Supplementary Table S3. Machine learning feature improtance in family G5.
	SNPs						Indels
	maternal-only heterozygous		paternal-only heterozygous		double-heterozygous		maternal-only heterozygous		paternal-only heterozygous		double-heterozygous
0	PP_het	0.0898141	PP_het	0.0827381	PP_homalt	0.0888395	PP_homref	0.0942454	GT	0.082216	GT	0.0689422
1	PP_homalt	0.0728529	GT	0.0754118	GT	0.0707828	PP_het	0.0857204	PP_homref	0.0729365	PP_homalt	0.0678385
2	PP_homref	0.0713778	PP_homref	0.060905	GL_homalt	0.0641673	QUAL	0.0752604	QUAL	0.0703558	GL_homalt	0.0576366
3	GT	0.0705463	QUAL	0.0555945	AB	0.0604078	GL_het	0.0681176	PP_het	0.059981	PP_het	0.0556145
4	GL_het	0.0652493	PP_homalt	0.043311	PP_het	0.0576144	GT	0.0678297	RPL	0.0503466	QUAL	0.0534589
5	GL_homalt	0.0605654	RPL	0.0429697	QUAL	0.0469893	GL_homref	0.0619621	QA	0.0414523	GL_het	0.0489208
6	GL_homref	0.0590718	GL_het	0.0403327	GL_het	0.0431537	AB	0.0619434	RPR	0.0403071	AB	0.0484029
7	QUAL	0.0577548	RPR	0.0401223	PP_homref	0.0360228	PP_homalt	0.0521017	PP_homalt	0.039968	PP_homref	0.0423334
8	AB	0.0244594	AB	0.0332584	GL_homref	0.0358186	GL_homalt	0.0395621	SAF	0.0364726	GL_homref	0.0322714
9	ABP	0.014978	QA	0.0313061	ABP	0.0294042	ABP	0.0330115	AB	0.0312797	ABP	0.0243189
10	RPL	0.0131439	AO	0.0292516	ODDS	0.0198123	PAF	0.0160536	QR	0.0307207	PAB	0.020517
11	QA	0.0118719	SAF	0.0289256	PABP	0.018292	PG_homref	0.0117008	AO	0.0277845	PODDS	0.0202209
12	MFQ	0.0111506	QR	0.0285966	PAB	0.0164329	MFQ	0.0108008	SRR	0.0273751	PABP	0.0171053
13	PG_homref	0.0100981	RO	0.0266126	PODDS	0.0151009	PAC	0.0102709	AF	0.0260267	PRO	0.0157825
14	PAIRED	0.00960058	GL_homref	0.0254491	QR	0.014221	FRO	0.0100064	SAR	0.0260021	QR	0.0144149
15	SAF	0.00950322	AF	0.0247033	PSRF	0.0139557	PG_homalt	0.00994943	SRF	0.0213599	ODDS	0.0126691
16	SAR	0.009406	SRF	0.0237561	PRO	0.013536	FQA	0.00905643	AC	0.0196113	MFQ	0.0126451
17	PG_homalt	0.00926859	SAR	0.021478	AO	0.0130805	RO	0.00835172	PAIRED	0.0193572	PQR	0.0121284
18	ODDS	0.00923611	SRR	0.01968	MFQ	0.0126633	ODDS	0.00829579	GL_homalt	0.0185143	AO	0.0119976
19	PAC	0.00906083	PAIRED	0.0196357	PMQM	0.0111971	FGL_homref	0.00818318	GL_het	0.0175029	MGL_homref	0.0118582
20	RPR	0.0089635	ABP	0.017508	PDPB	0.0106121	AO	0.00787202	GL_homref	0.0148927	QA	0.0110959
21	PABP	0.00868057	AC	0.0170705	PAO	0.0104548	FQR	0.00766841	MQMR	0.013283	PDP	0.0104872
22	SAP	0.00840914	RPP	0.0139386	FRO	0.0103281	MGL_homref	0.00678931	EPPR	0.0118521	PSRF	0.0104275
23	PMQM	0.00825466	ODDS	0.0129451	QA	0.00958663	QA	0.00664376	ODDS	0.0110508	PMQM	0.00984292
24	AO	0.0082424	MQMR	0.0123411	PQA	0.00934691	QR	0.00657441	RO	0.0110327	RO	0.00970805
25	PAB	0.00819917	MQM	0.0117844	MQMR	0.00926542	FGL_homalt	0.00637858	RPP	0.0100537	PQA	0.00957664
26	QR	0.00775166	PAIREDR	0.0115764	RO	0.00909638	PQA	0.00628196	MEANALT	0.0094494	PAO	0.00920044
27	RO	0.00738163	GL_homalt	0.0108626	PQR	0.00882704	PQR	0.00601666	technology_ILLUMINA	0.00920051	PSRR	0.00880329
28	RPP	0.00712839	MEANALT	0.00931439	MGL_homref	0.0087123	PAB	0.00528151	PG_homref	0.0091541	MGL_homalt	0.00867123
29	PODDS	0.00711847	SRP	0.00858561	FDP	0.00863197	PRO	0.00522218	ABP	0.00841283	PRPP	0.0082535
30	MQMR	0.00708495	PG_homref	0.00812567	FGL_homref	0.00858972	FGT	0.00512706	MQM	0.00730531	FDP	0.00789747
31	SRF	0.00699053	MGL_homalt	0.00782026	PSRR	0.00851129	PODDS	0.00507525	SRP	0.00625318	FQR	0.00765894
32	PRO	0.00682386	MGT	0.00670727	PDP	0.00829514	PSRR	0.00495679	MFQ	0.0060085	FGL_homref	0.00751987
33	PAF	0.00676563	MFQ	0.00602165	MQM	0.00813895	PABP	0.00483549	PAIREDR	0.00588947	MRO	0.00716005
34	PDP	0.00674987	MGL_homref	0.0056335	PRPP	0.00755533	PSRF	0.00479576	EPP	0.00579721	PDPB	0.00711427
35	PQA	0.00666402	FGL_homref	0.00531065	MRO	0.00750937	PDPRA	0.00466713	MGL_homalt	0.00570748	MQA	0.00692633
36	PDPB	0.00610004	EPP	0.00492228	MQA	0.0065394	RPR	0.00444452	FGL_homref	0.00402673	MQM	0.00688539
37	SRR	0.00591633	RPPR	0.00473222	MGL_homalt	0.00650394	FAO	0.00431085	PAF	0.00397538	MQMR	0.00680338
38	PAO	0.0052238	EPPR	0.00349359	MQR	0.00612021	MQA	0.00424821	PSAF	0.00394907	SRR	0.00656782
39	PQR	0.00512209	MGL_het	0.0034485	FQR	0.00583917	SAF	0.00415447	MQR	0.00360537	RPP	0.0064833
40	EPP	0.00509897	PAO	0.00344018	RPP	0.0058026	RPL	0.00410455	MGT	0.00357051	RPL	0.00642653
41	MGL_homalt	0.00508026	PQA	0.00334391	DPB	0.0054284	PSAR	0.00403332	RPPR	0.00351065	PSAF	0.00640445
42	FDP	0.00503496	PG_homalt	0.0031968	SRR	0.00541406	SAR	0.00377847	MGL_het	0.00350045	PMQMR	0.00606381
43	PRPP	0.00491084	PODDS	0.00288988	RPL	0.00536536	FGL_het	0.00375024	PAO	0.00328895	MQR	0.00588777
44	MGL_homref	0.00487154	MQR	0.00271652	PMQMR	0.00528542	DPB	0.00372076	PQA	0.0032043	SRF	0.00556094
45	MQM	0.00485898	FQA	0.00228556	RPR	0.00523034	PRPR	0.00370228	PODDS	0.00294796	RPR	0.00555302
46	PSAR	0.00476001	PMQM	0.0022245	MAO	0.00512347	RPP	0.0036474	PAC	0.00269937	DPB	0.00524613
47	RPPR	0.00474286	PRO	0.00215573	MDP	0.00499717	MQM	0.00351486	MQA	0.00242325	MDP	0.00523248
48	PDPRA	0.00463524	MAO	0.00208849	SAF	0.00490188	DP	0.00350557	FQA	0.00234935	FGL_homalt	0.00519184
49	FGL_homref	0.00447964	PAB	0.00206515	PRPL	0.00479674	PMQM	0.0034402	MAO	0.00232042	DP	0.00506072
50	MQA	0.00447786	MQA	0.0019905	FQA	0.00469837	MQR	0.00338389	PMQM	0.00231436	FQA	0.0050287
51	PSRR	0.00445731	PDPRA	0.00154097	PSAF	0.00464778	MQMR	0.00335181	MGL_homref	0.00224234	RPPR	0.00498231
52	FRO	0.00443129	PABP	0.0014093	SRF	0.00461985	MGL_homalt	0.00324526	PAB	0.00219221	FRO	0.00491515
53	AC	0.00430316	PSAP	0.00140556	DP	0.00454359	RPPR	0.00319916	PRO	0.00214463	MAO	0.00473149
54	AF	0.00424471	PAC	0.00139023	FGL_homalt	0.00453585	PAO	0.00319132	PABP	0.00149724	SAR	0.00472666
55	FAO	0.00421994	PMQMR	0.0013567	FAO	0.00424015	SRF	0.00315737	FGL_homalt	0.00145399	FAO	0.00470993
56	PAIREDR	0.00408911	FAO	0.00124673	PRPR	0.00423793	PPQR	0.00315156	PSAP	0.00143902	PRPPR	0.00462252
57	FQR	0.00405677	PDP	0.00119705	PRPPR	0.00421047	SRR	0.00315017	PDPRA	0.00142138	PSAR	0.0045116
58	PSRF	0.00398679	FGL_homalt	0.00118051	RPPR	0.00417707	PPRO	0.00303377	PMQMR	0.00127307	SAF	0.0042683
59	MGL_het	0.00397744	PSRR	0.00112917	PSAP	0.0041086	POS	0.00298709	DP	0.00122445	PRPR	0.00425064
60	FQA	0.00390638	MRO	0.00111956	PSRP	0.00386008	PRPP	0.00296762	DPB	0.00120911	PSAP	0.0040463
61	MQR	0.00379897	FQR	0.00111312	POS	0.00373034	PCIGAR	0.00291022	PRPP	0.0011946	PRPL	0.00396863
62	FGL_homalt	0.00363894	PQR	0.00108952	SAR	0.00350248	PMQMR	0.00278833	POS	0.00118488	POS	0.00392784
63	MAO	0.00348802	POS	0.00107341	PSAR	0.00345173	PDPB	0.00268773	PG_homalt	0.00117503	PCIGAR	0.00379725
64	DP	0.00331359	PSRP	0.00106082	SAP	0.00337557	PPAO	0.00267256	FAO	0.00117277	PSRP	0.00376851
65	MGT	0.00327275	PRPP	0.00105911	SRP	0.00337281	PRPPR	0.00263153	FQR	0.00116558	SAP	0.00363632
66	PMQMR	0.00326096	SAP	0.00104796	PAIREDR	0.00336524	PAIREDR	0.00262963	PQR	0.00114755	PAIREDR	0.00351432
67	MDP	0.00321992	DP	0.00103727	PEPP	0.00323196	PDP	0.00262637	PSRP	0.00112253	PEPP	0.00345634
68	technology_ILLUMINA	0.00309394	PRPPR	0.00100255	EPPR	0.00322131	EPPR	0.00262501	PRPPR	0.00110371	SRP	0.003449
69	MRO	0.00303785	DPB	0.000955149	EPP	0.00315741	SRP	0.00258094	MRO	0.00108039	EPPR	0.00343894
70	SRP	0.00291641	PEPPR	0.000948464	PEPPR	0.0030907	SAP	0.00257641	PDPB	0.00107176	EPP	0.00342144
71	EPPR	0.00287661	PDPB	0.000946247	PAIRED	0.00298014	EPP	0.00256432	SAP	0.00106703	PEPPR	0.00328441
72	DPB	0.00276579	PSAR	0.000894878	PPAIREDR	0.0024731	MRO	0.00256421	PEPPR	0.00103973	PAIRED	0.00325436
73	FGL_het	0.00253115	PEPP	0.000878248	CHROM	0.00234107	PAIRED	0.00253584	PEPP	0.00100598	ALT	0.00284936
74	FGT	0.00247565	PRPR	0.000874416	PPAIRED	0.00203608	PEPPR	0.002526	FRO	0.000978031	PPAO	0.00277014
75	PSAP	0.00241948	FDP	0.000840819	REF	0.000993054	PSRP	0.00250643	FDP	0.000940508	PPQR	0.00274791
76	PRPR	0.00236866	PSRF	0.000831483	ALT	0.000962908	MDP	0.00235912	PDP	0.00091622	PPRO	0.00273154
77	PRPPR	0.00236785	FRO	0.000817811	AF	0.000635209	PSAP	0.0022816	MDP	0.000913046	REF	0.0026588
78	POS	0.00233838	MDP	0.00078673	PMEANALT	0.000626632	MAO	0.00227671	PSRR	0.000880073	PPAIREDR	0.00262537
79	PSAF	0.00224912	CHROM	0.000733809	MEANALT	0.000502904	PEPP	0.00226365	PRPR	0.000876561	CHROM	0.00250214
80	PSRP	0.00216859	PRPL	0.000708958	PGTI	0.000447377	ALT	0.00223935	PSAR	0.000869877	PPQA	0.0024265
81	PRPL	0.00204221	PPAIREDR	0.000685443	PCIGAR	0.000334188	REF	0.00222428	PSRF	0.000868136	CIGAR	0.00239504
82	PEPPR	0.00197979	PSAF	0.000673141	AC	0.000307976	PRPL	0.00215162	CHROM	0.000814551	PPAIRED	0.00219701
83	PEPP	0.00195253	PAF	0.000492886	PPQR	0.000304289	PPQA	0.00211445	PPQR	0.000810542	TYPE	0.00179837
84	MEANALT	0.00189217	PPAIRED	0.000410441	PPRO	0.000295403	FDP	0.00209634	ALT	0.000793591	PTYPE	0.00106979
85	PPAIREDR	0.00155635	REF	0.000298785	PLEN	0.000290272	PPAIREDR	0.0020048	PRPL	0.000792051	PMEANALT	0.000992461
86	CHROM	0.00153632	ALT	0.00029013	PPQA	0.00027744	CHROM	0.00198719	REF	0.00077042	PLEN	0.000828382
87	PPAIRED	0.00113015	PMEANALT	0.000190258	PTYPE	0.000251117	PSAF	0.00180763	PCIGAR	0.00076543	MEANALT	0.000782735
88	REF	0.000647651	PCIGAR	0.000101747	PPAO	0.000238293	CIGAR	0.00171539	PPAIREDR	0.000742798	LEN	0.000748844
89	ALT	0.000622789	technology_ILLUMINA	9.87862e-05	technology_ILLUMINA	1.93731e-05	PPAIRED	0.00137971	PPAO	0.000558866	AC	0.00045037
90	PMEANALT	0.000367149	PPQR	9.5052e-05	PNUMALT	2.18317e-06	PTYPE	0.00135018	PPQA	0.000544877	PGTI	0.000440789
91	PGTI	0.00026583	PLEN	8.91306e-05	NUMALT	1.4578e-07	PMEANALT	0.00084484	PPRO	0.00053934	AF	0.000393173
92	PCIGAR	0.000204999	PPRO	8.85102e-05	TYPE	0	AF	0.00083953	PPAIRED	0.00050149	technology_ILLUMINA	8.70157e-05
93	PPQR	0.000189584	PPQA	7.23691e-05	RUN	0	TYPE	0.000732715	CIGAR	0.00049846	PNUMALT	3.18325e-06
94	PLEN	0.000186968	PTYPE	6.95608e-05	Ptechnology_ILLUMINA	0	MEANALT	0.000624424	PMEANALT	0.000328313	NUMALT	1.9341e-06
95	PPRO	0.000185527	PPAO	5.77422e-05	PRUN	0	PLEN	0.000559103	PTYPE	0.000281066	RUN	0
96	PTYPE	0.000158506	PGTI	2.8371e-05	PNS	0	LEN	0.000471384	TYPE	0.000273247	Ptechnology_ILLUMINA	0
97	PPQA	0.000143755	PNUMALT	3.36672e-06	PG_homref	0	AC	0.000352048	PLEN	0.000251487	PRUN	0
98	PPAO	0.000128249	NUMALT	2.56989e-07	PG_homalt	0	PGTI	4.43543e-05	LEN	0.000208807	PNS	0
99	PNUMALT	2.4143e-06	TYPE	0	PG_het	0	technology_ILLUMINA	4.1474e-05	PGTI	3.56615e-05	PG_homref	0
100	NUMALT	2.22188e-07	RUN	0	PDPRA	0	PNUMALT	1.87092e-05	NUMALT	9.06218e-06	PG_homalt	0
101	TYPE	0	Ptechnology_ILLUMINA	0	PAN	0	NUMALT	9.64585e-06	PNUMALT	8.77992e-06	PG_het	0
102	RUN	0	PRUN	0	PAF	0	RUN	0	RUN	0	PDPRA	0
103	Ptechnology_ILLUMINA	0	PNS	0	PAC	0	Ptechnology_ILLUMINA	0	Ptechnology_ILLUMINA	0	PAN	0
104	PRUN	0	PG_het	0	NS	0	PRUN	0	PRUN	0	PAF	0
105	PNS	0	PAN	0	MGT	0	PNS	0	PNS	0	PAC	0
106	PG_het	0	NS	0	MGL_het	0	PG_het	0	PG_het	0	NS	0
107	PAN	0	LEN	0	LEN	0	PAN	0	PAN	0	MGT	0
108	NS	0	GTI	0	GTI	0	NS	0	NS	0	MGL_het	0
109	LEN	0	FGT	0	FGT	0	MGT	0	GTI	0	GTI	0
110	GTI	0	FGL_het	0	FGL_het	0	MGL_het	0	FGT	0	FGT	0
111	CIGAR	0	CIGAR	0	CIGAR	0	GTI	0	FGL_het	0	FGL_het	0
